# Supplementary material for: Critical roles of transcriptional coactivator MED1 in the formation and function of mouse adipose tissues
Source: PubMed Central journal article supplement — Genes Dev. 2021 May 1;35(9-10):729–48. doi: 10.1101/gad.346791.120 (PMC8091968; doi:10.1101/gad.346791.120), 2021-05-01
Supplement: supp_gad.346791.120_Supplemental_Fig_S2.pdf [file supp_gad.346791.120_Supplemental_Fig_S2.pdf]

## Supplemental\_Fig\_S2

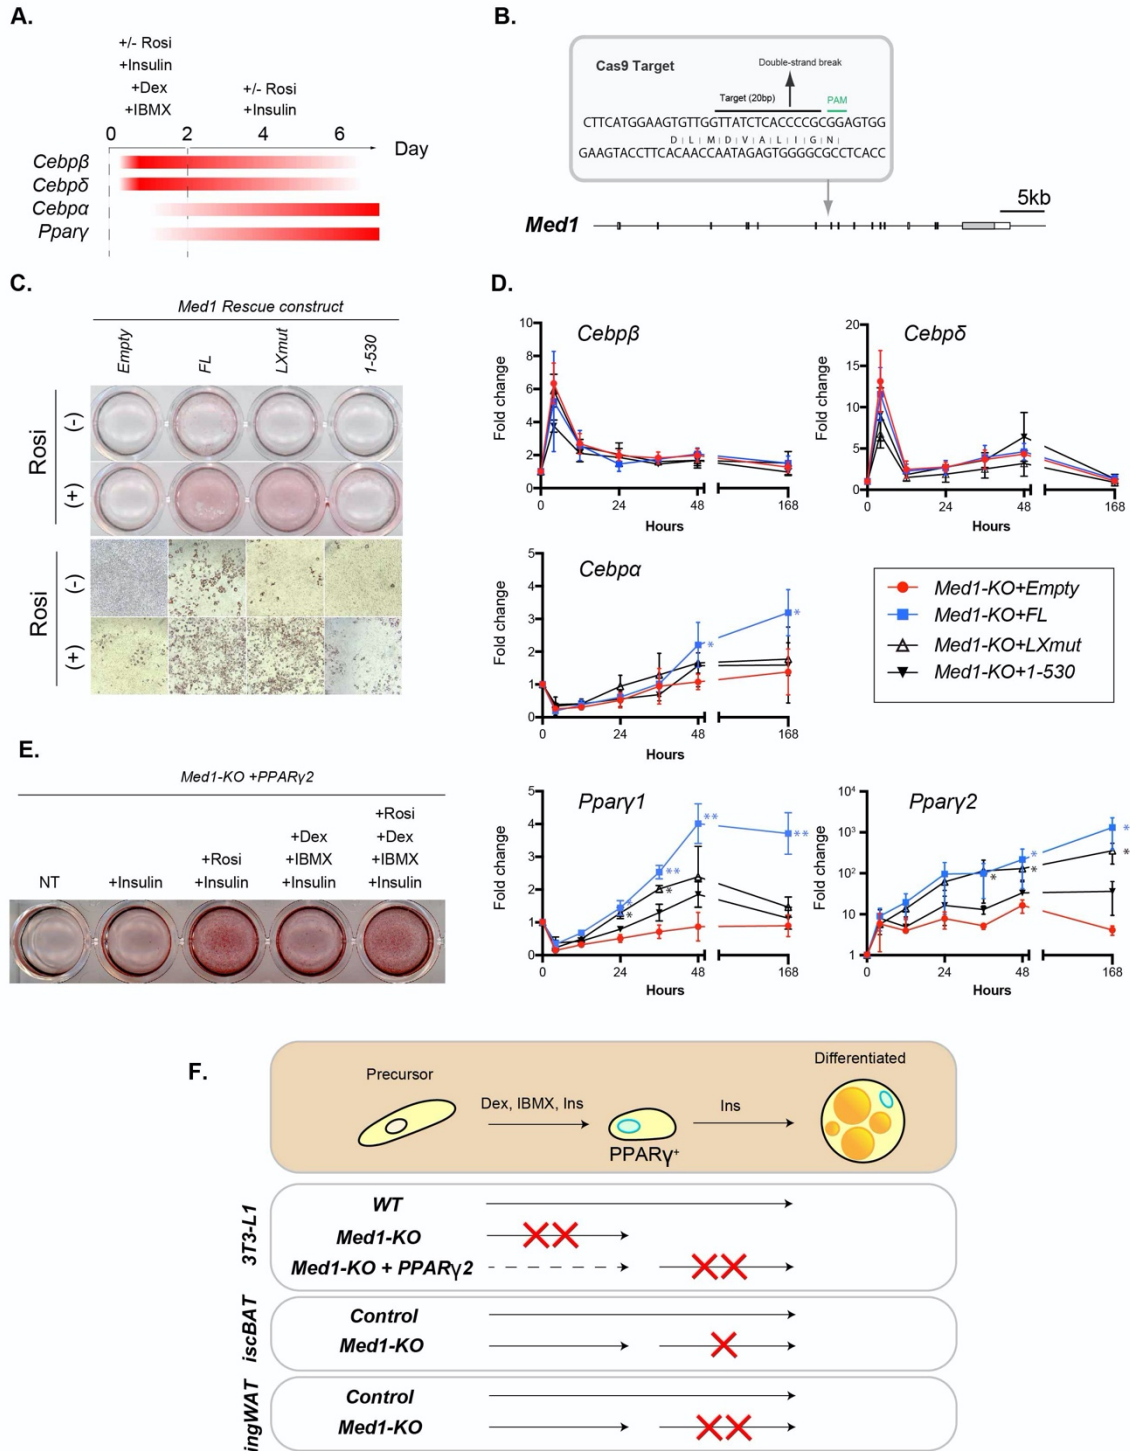

**Figure S2: MED1 is required at distinct steps in 3T3-L1 differentiation**

**A)** Diagram of the expression pattern of adipogenic transcription factors during differentiation. **B)** Design of *Med1*-knockout by CRISPR/Cas9. sgRNA is designed at exon 9. **C)** Oil-red-O staining of differentiated *Med1*-KO 3T3-L1 cells expressing different forms of MED1 in the absence or presence of Rosi. Rosi efficiently rescues the adipogenesis defect in cells re-expressing full length and LX-mutant forms of MED1. **D)** qRT-PCR of adipogenic transcription factors at 0, 12, 24, 36, 48, and 168 hours of differentiation of 3T3-L1 cells expressing different forms of MED1 in conventional culture. 36B4 (RPLP0) mRNA expression was used as internal control, and expression levels at 0 hours are set as 1 for each condition (mean,  $\pm$  SD, n=3, \*p<0.05 (T-test): compared to *Med1*-KO NC). Representative data from KO Clone#15 is presented. **E)** Oil-red-O staining of *Med1*-KO 3T3-L1 cells ectopically expressing PPAR $\gamma$ 2 under different culture conditions. Rosi addition allows efficient differentiation in the absence of MED1 as long as PPAR $\gamma$ 2 is expressed. **F)** Summary of the *in vitro* cell culture experiments under conventional culture conditions without the use of Rosiglitazone. XX and X indicate strong and weak blocks, respectively, with loss of MED1.
