# Supplementary material for: Critical roles of transcriptional coactivator MED1 in the formation and function of mouse adipose tissues
Source: PubMed Central journal article supplement — Genes Dev. 2021 May 1;35(9-10):729–48. doi: 10.1101/gad.346791.120 (PMC8091968; doi:10.1101/gad.346791.120), 2021-05-01
Supplement: supp_gad.346791.120_Supplemental_Fig_S3.pdf [file supp_gad.346791.120_Supplemental_Fig_S3.pdf]

Supplemental\_Fig\_S3

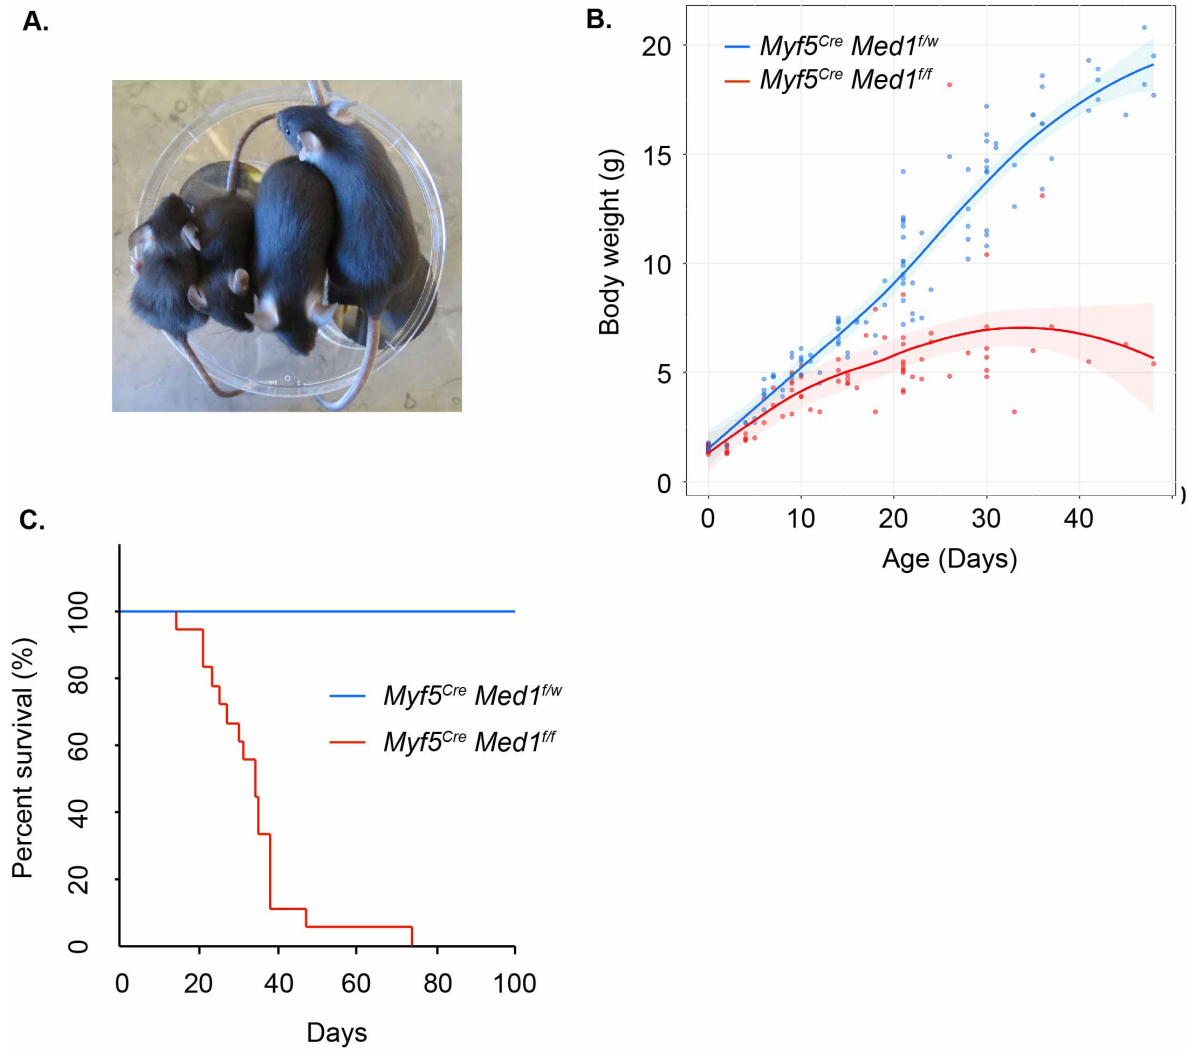

**Figure S3: Growth retardation and lethality of the *Myf5<sup>Cre</sup> Med1<sup>ff</sup>* mouse.**

**A)** Macroscopic view of *Myf5<sup>Cre</sup> Med1<sup>ff</sup>* mice (two mice on the left side) with littermate

control mice (*Myf5<sup>Cre</sup> Med1<sup>f/w</sup>*, two mice on the right). **B)** Body weight transition of

*Myf5<sup>Cre</sup> Med1<sup>f/w</sup>* and *Myf5<sup>Cre</sup> Med1<sup>ff</sup>* male mice (Mean, Confidence interval 0.95). *Myf5<sup>Cre</sup> Med1<sup>ff</sup>* mice display severe growth retardation. **C)** Survival curve of *Myf5<sup>Cre</sup> Med1<sup>f/w</sup>* (n=54) and *Myf5<sup>Cre</sup> Med1<sup>ff</sup>* mice (n=30).
