# Supplementary material for: Critical roles of transcriptional coactivator MED1 in the formation and function of mouse adipose tissues
Source: PubMed Central journal article supplement — Genes Dev. 2021 May 1;35(9-10):729–48. doi: 10.1101/gad.346791.120 (PMC8091968; doi:10.1101/gad.346791.120), 2021-05-01
Supplement: supp_gad.346791.120_Supplemental_Fig_S4.pdf [file supp_gad.346791.120_Supplemental_Fig_S4.pdf]

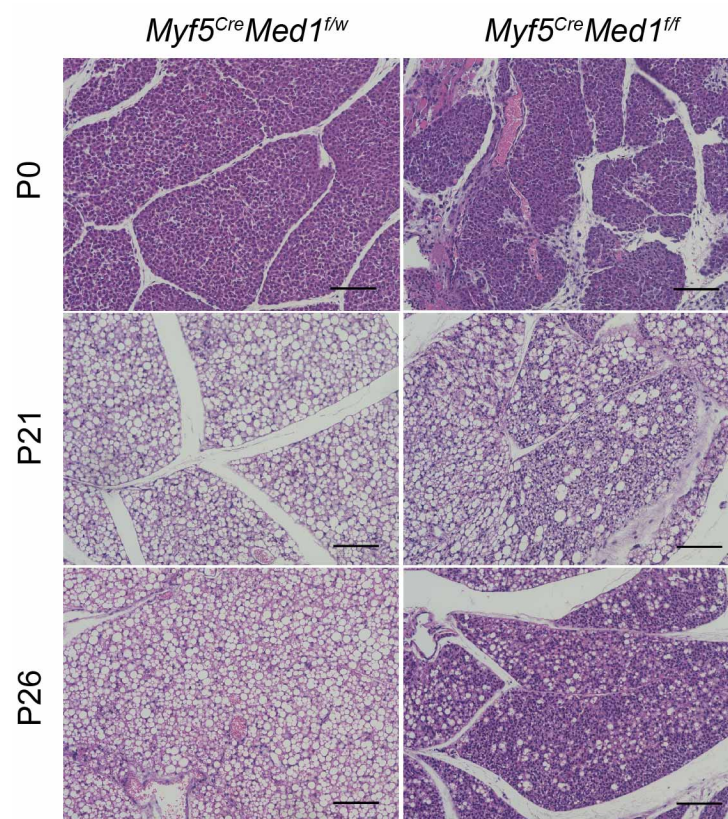

**Figure S4: Decreased lipid droplet accumulation in postnatal *Myf5<sup>Cre</sup>Med1<sup>ff</sup>* mice**  
H&E staining of postnatal (P0, P21, P26) BAT of *Myf5<sup>Cre</sup>Med1<sup>f/w</sup>* and *Myf5<sup>Cre</sup>Med1<sup>ff</sup>* mice. Decreased lipid droplet accumulation in postnatal *Myf5<sup>Cre</sup>Med1<sup>ff</sup>* BAT is observed. Bars indicate 100 μm.
