# Supplementary material for: Critical roles of transcriptional coactivator MED1 in the formation and function of mouse adipose tissues
Source: PubMed Central journal article supplement — Genes Dev. 2021 May 1;35(9-10):729–48. doi: 10.1101/gad.346791.120 (PMC8091968; doi:10.1101/gad.346791.120), 2021-05-01
Supplement: supp_gad.346791.120_Supplemental_Fig_S5.pdf [file supp_gad.346791.120_Supplemental_Fig_S5.pdf]

## Supplemental\_Fig\_S5

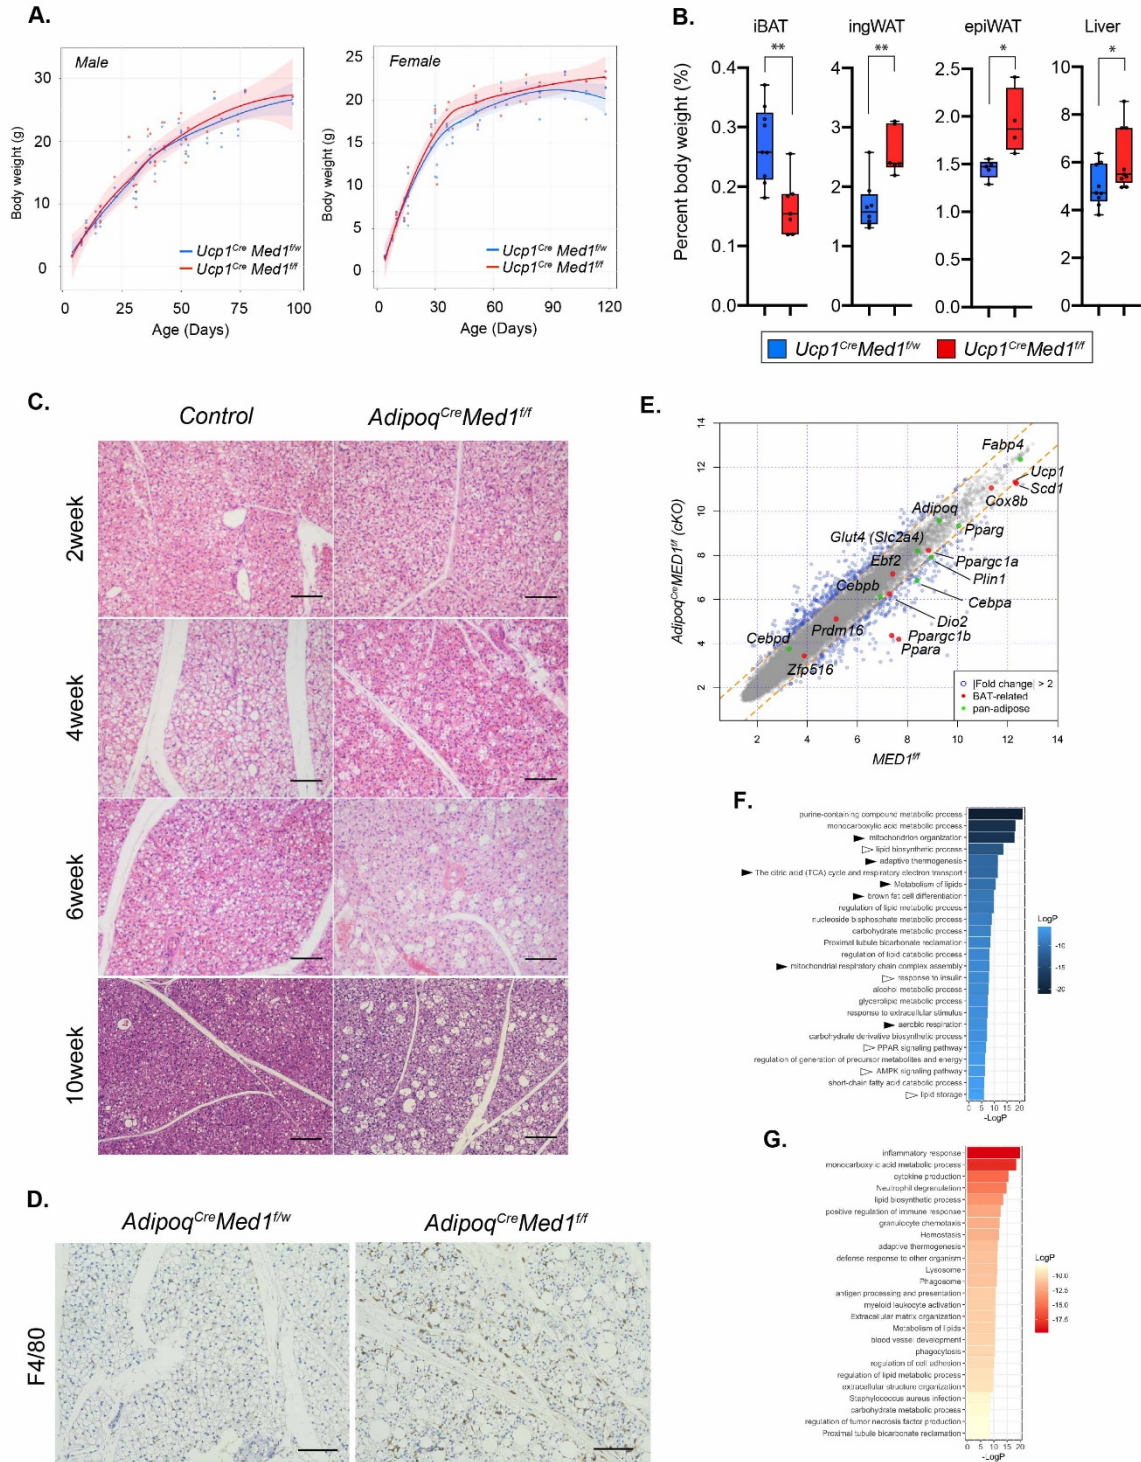

**Figure S5: Analysis of adult BAT in the absence of MED1**

**A)** Body weight transition of *Ucp1<sup>Cre</sup>Med1<sup>f/w</sup>* and *Ucp1<sup>Cre</sup>Med1<sup>ff</sup>* mice (Mean, Confidence interval 0.95). Both male and female *Ucp1<sup>Cre</sup>Med1<sup>ff</sup>* mice showed a trend toward an increase in body weight in young adults. **B)** Percentage of tissue weight over body weight values are shown. Note that while BAT is smaller in *Ucp1<sup>Cre</sup>Med1<sup>ff</sup>* mice compared to *Ucp1<sup>Cre</sup>Med1<sup>f/w</sup>* mice, WAT and liver show increase masses in *Ucp1<sup>Cre</sup>Med1<sup>ff</sup>* mice (mean,  $\pm$  SD, \* $p < 0.05$ , \*\* $p < 0.005$  (T-test)). **C)** H&E staining of paraffin sections of BAT tissues harvested postnatally from control and *Adipoq<sup>Cre</sup>Med1<sup>ff</sup>* mice at 2, 4, 6, and 10 weeks of age. Bars indicate 100  $\mu$ m. **D)** Immunohistochemistry of F4/80 antigen in 10-week old BAT of *Adipoq<sup>Cre</sup>Med1<sup>f/w</sup>* and *Adipoq<sup>Cre</sup>Med1<sup>ff</sup>* mice. Bars indicate 100  $\mu$ m. **E)** microarray analysis of BAT isolated from *Med1<sup>ff</sup>* (n=2) and *Adipoq<sup>Cre</sup>Med1<sup>ff</sup>* (n=2) mice. Genes with changes >2-fold between conditions are plotted in blue. Representative pan-adipose genes are plotted in green, and representative BAT-genes are plotted in red. **F)** GO enrichment analysis of down-regulated genes in BAT of *Adipoq<sup>Cre</sup>Med1<sup>ff</sup>* mice are shown. Top 25 categories are shown. White arrowheads correspond to pan-adipose-related terms and black arrowheads correspond to BAT-related terms. **G)** GO enrichment analysis of upregulated genes in BAT of *Adipoq<sup>Cre</sup>Med1<sup>ff</sup>* mice is shown.
