# Supplementary material for: Critical roles of transcriptional coactivator MED1 in the formation and function of mouse adipose tissues
Source: PubMed Central journal article supplement — Genes Dev. 2021 May 1;35(9-10):729–48. doi: 10.1101/gad.346791.120 (PMC8091968; doi:10.1101/gad.346791.120), 2021-05-01
Supplement: supp_gad.346791.120_Supplemental_Fig_S7.pdf [file supp_gad.346791.120_Supplemental_Fig_S7.pdf]

Supplemental\_Fig\_S7

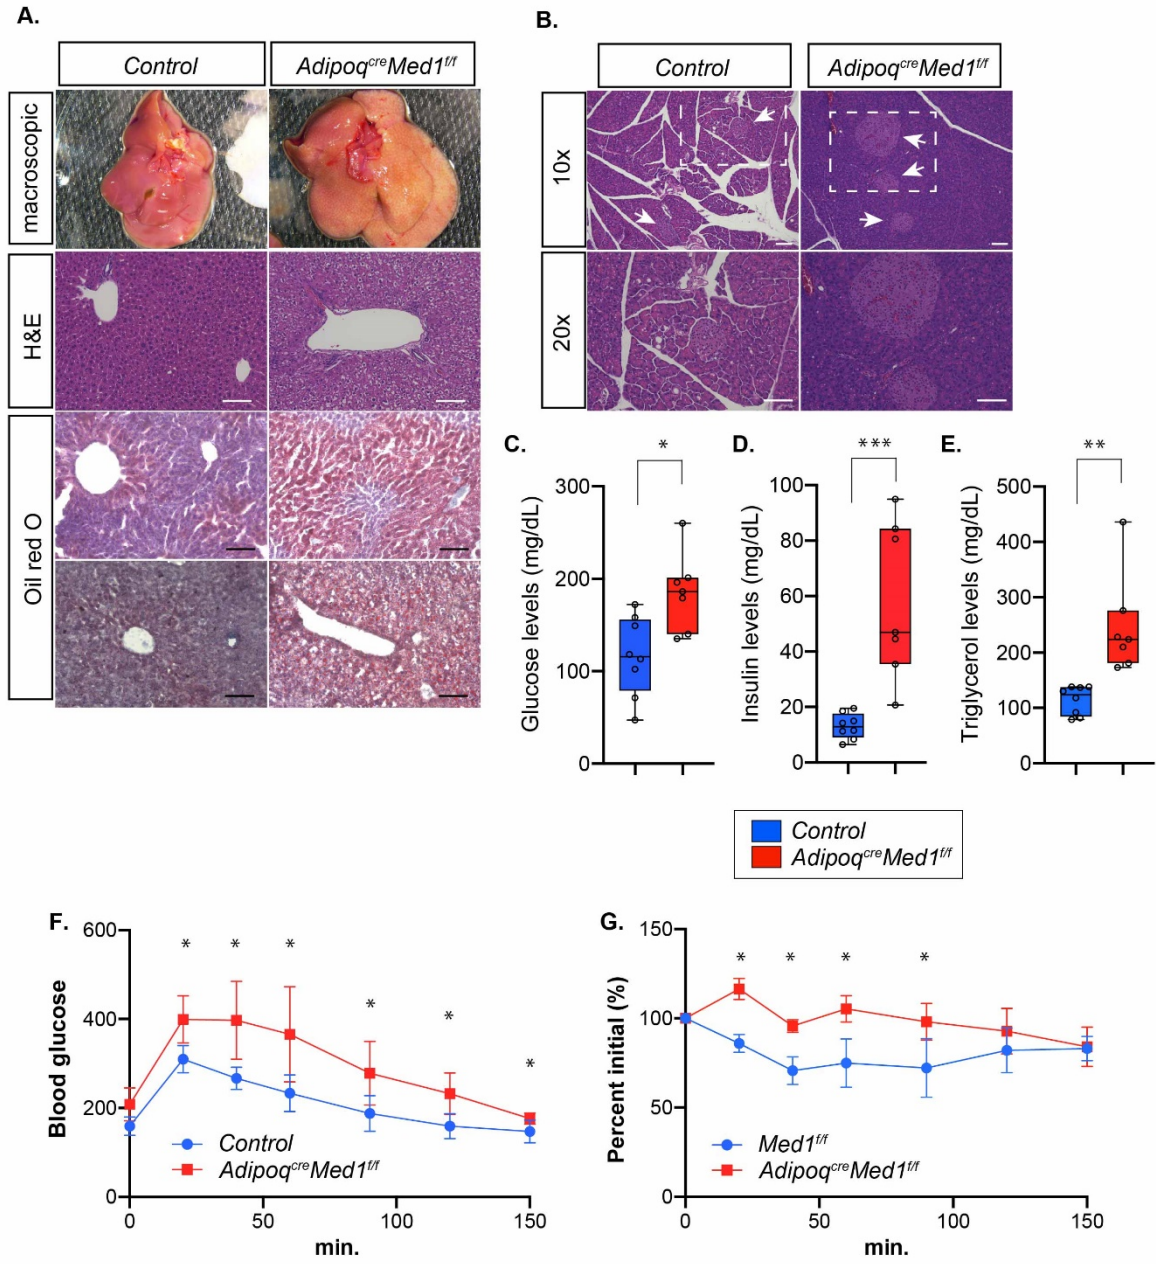

**Figure S7: Metabolic characterization of *Adipoq<sup>Cre</sup>Med1<sup>ff</sup>* mice**

**A)** Macroscopic images of livers dissected from 3-month old *Med1<sup>f/w</sup>* and *Adipoq<sup>Cre</sup>Med1<sup>ff</sup>* mice (upper panels). H&E examination of paraffin sections of the liver (middle panels), and oil-red-O staining of cryo-sections of two independent livers with different degrees of steatosis (lower panels). White bars indicate 100  $\mu$ m. **B)** H&E staining of pancreases from 3 months old *Med1<sup>f/w</sup>* and *Adipoq<sup>Cre</sup>Med1<sup>ff</sup>* mice. White arrows indicate the islets. White bars indicate 100  $\mu$ m. **C-E)** Non-fasted serum levels of C) glucose, D) insulin, and E) triglyceride levels from 2-3 month old *Med1<sup>f/w</sup>* (n=8) and *Adipoq<sup>Cre</sup>Med1<sup>ff</sup>* (n=7) male mice. **F)** Glucose tolerance test at 3-4 months old mice. *Control* (*Adipoq<sup>Cre</sup>Med1<sup>f/w</sup>* and *Med1<sup>ff</sup>*, n=9) and *Adipoq<sup>Cre</sup>Med1<sup>ff</sup>* (n=8) mice. **G)** Insulin tolerance test in 2-3 months old male *Med1<sup>ff</sup>* (n=4) and *Adipoq<sup>Cre</sup>Med1<sup>ff</sup>* (n=4) mice (C to G, mean,  $\pm$  SD, \*p<0.05 (T-test)).
